# Supplementary material for: Myrmekite and strain weakening in granitoid mylonites
Source: Copernicus journal article supplement (doi:10.5194/se-2018-70), 2018-08-01
Supplement: Supplementary file 1 [file se-2018-70-supplement.pdf]

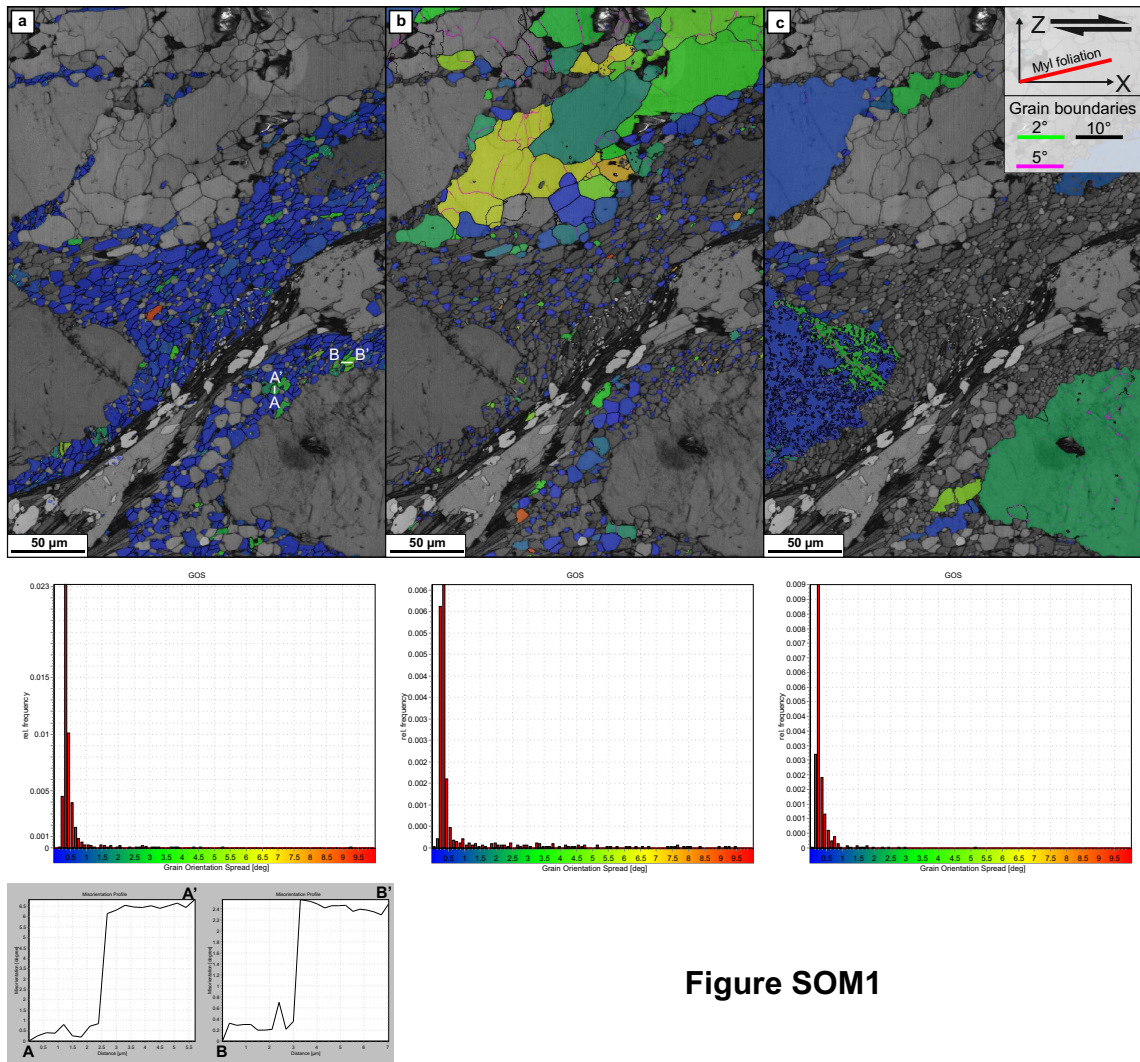

Figure SOM1

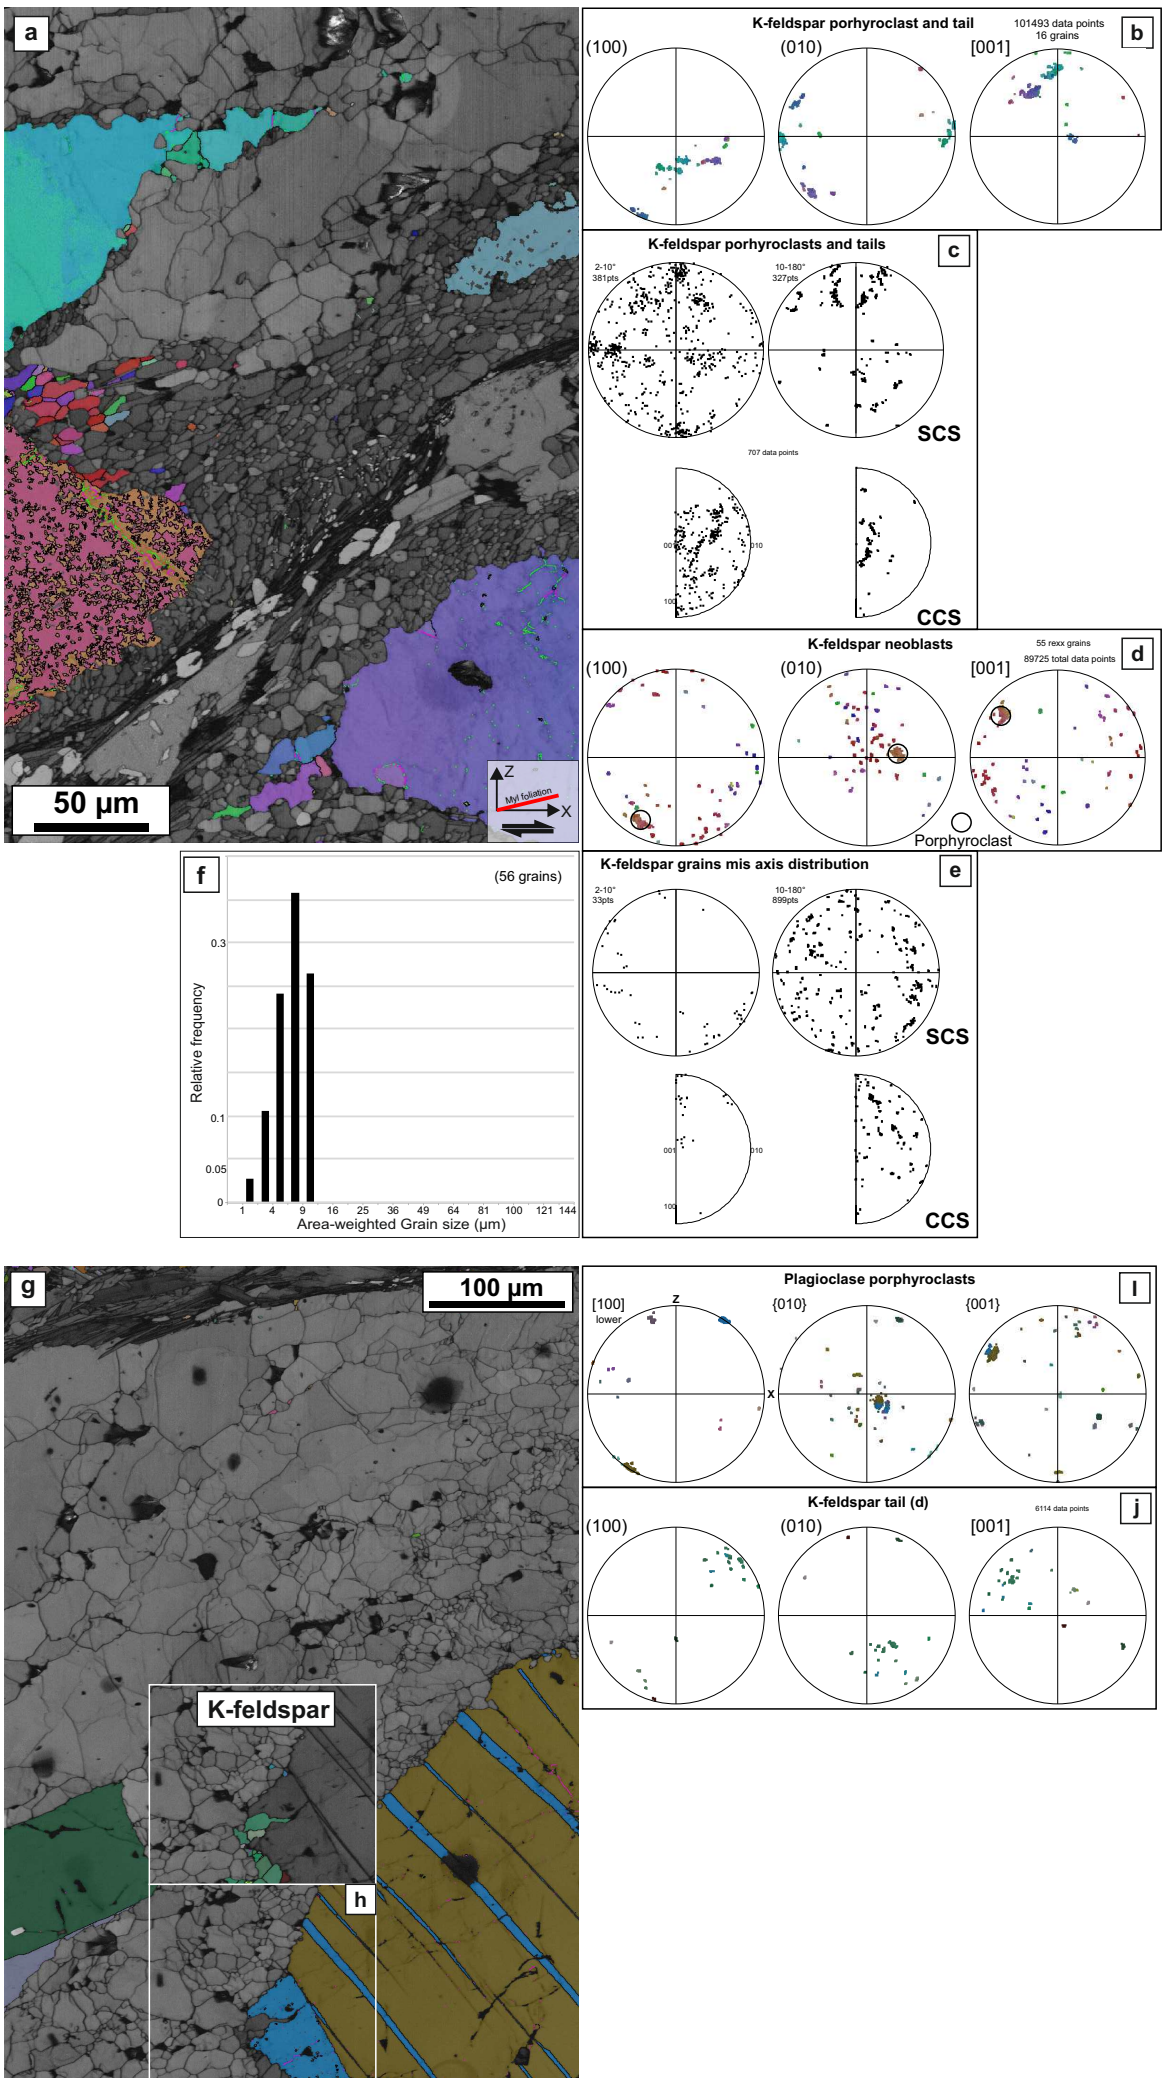

Fig. SOM2

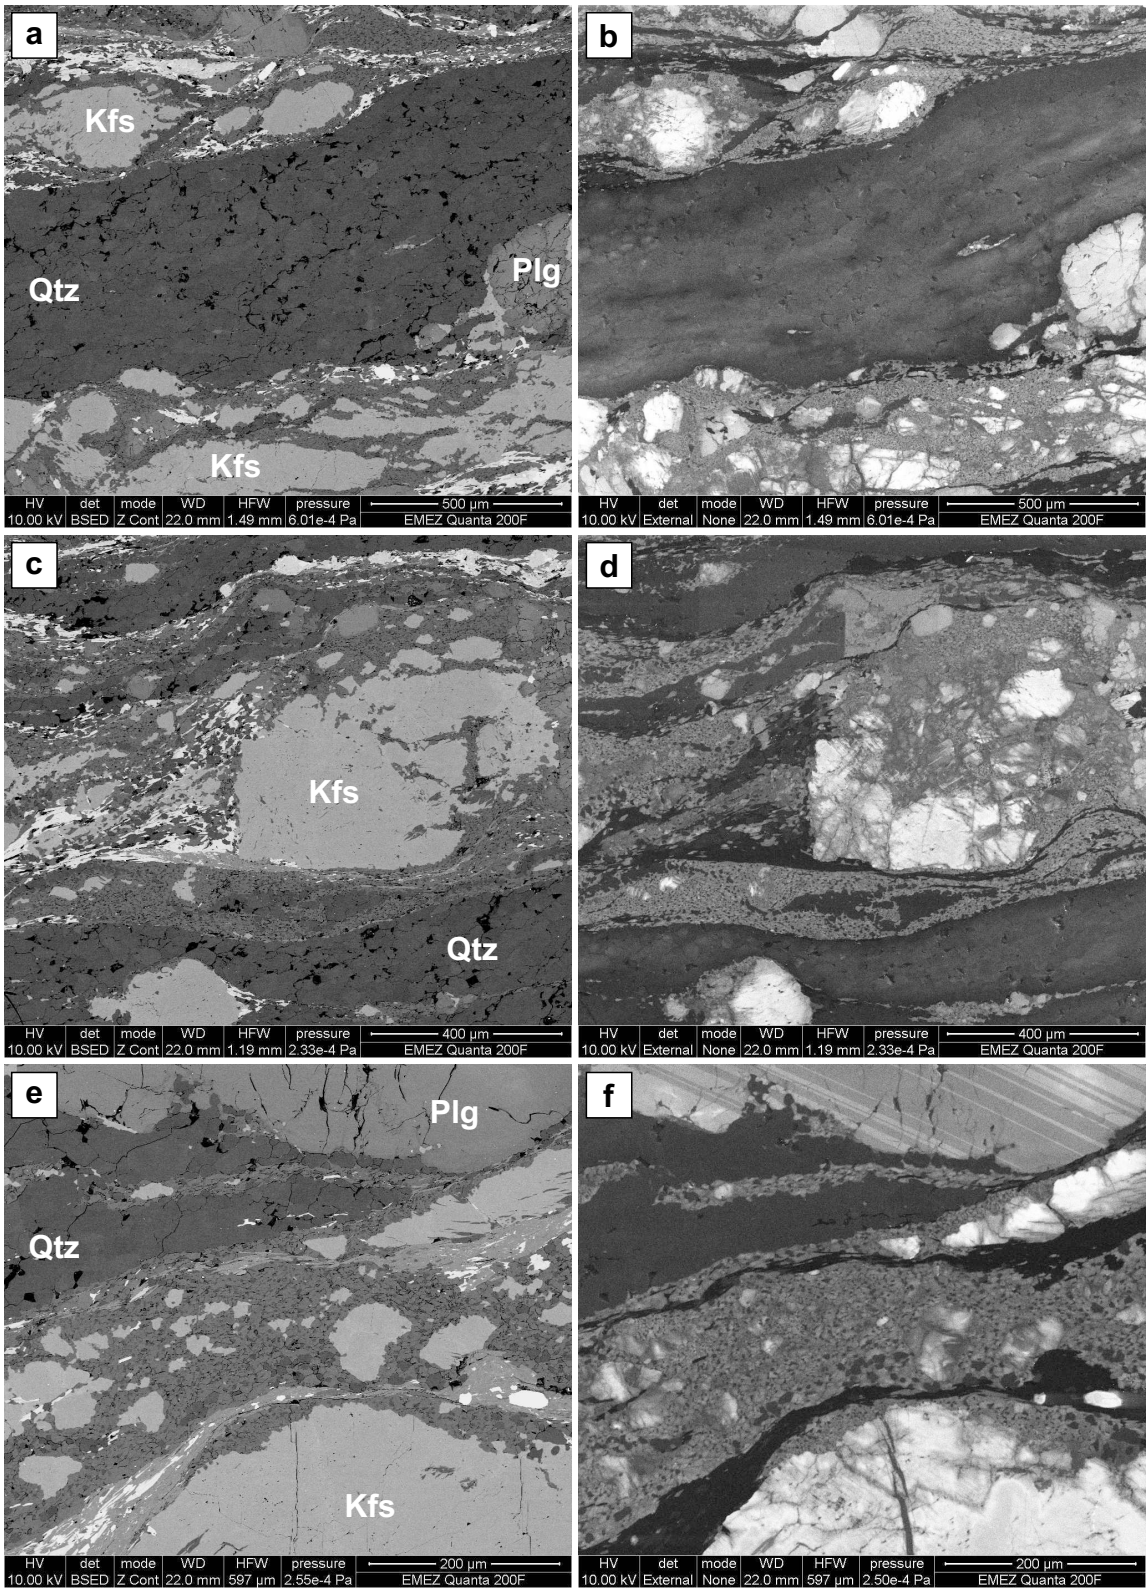

**Figure SOM3**

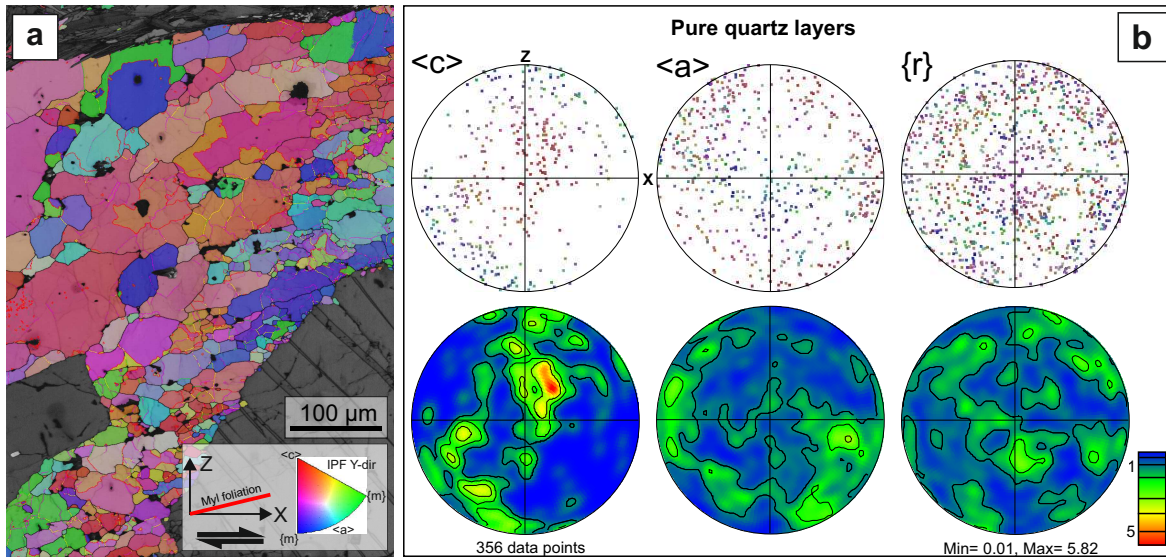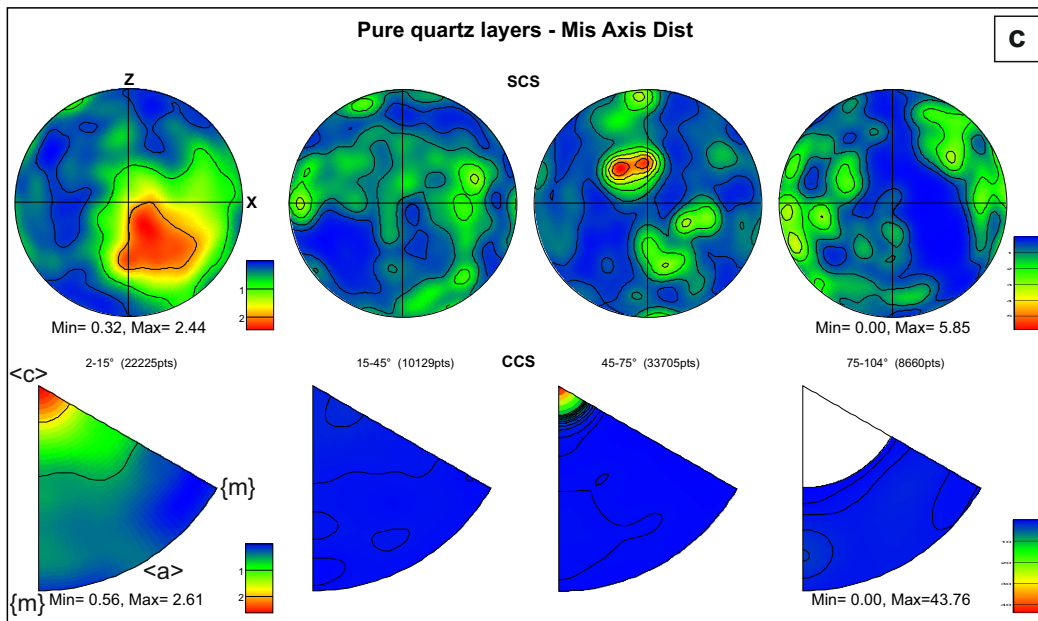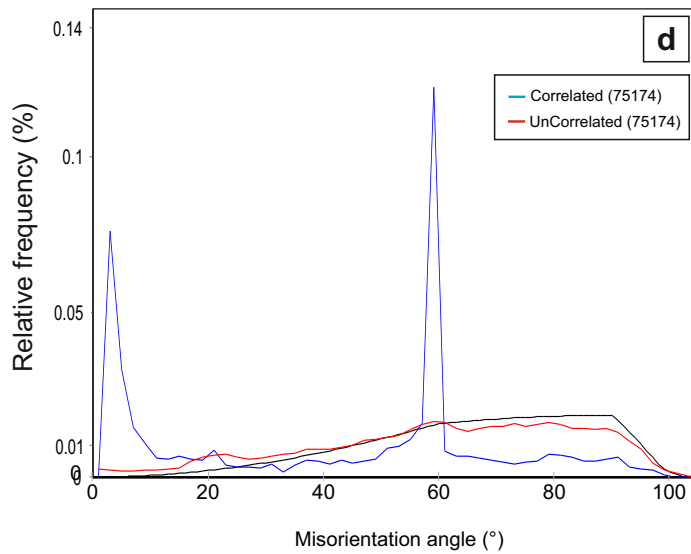

**Figure SOM4**

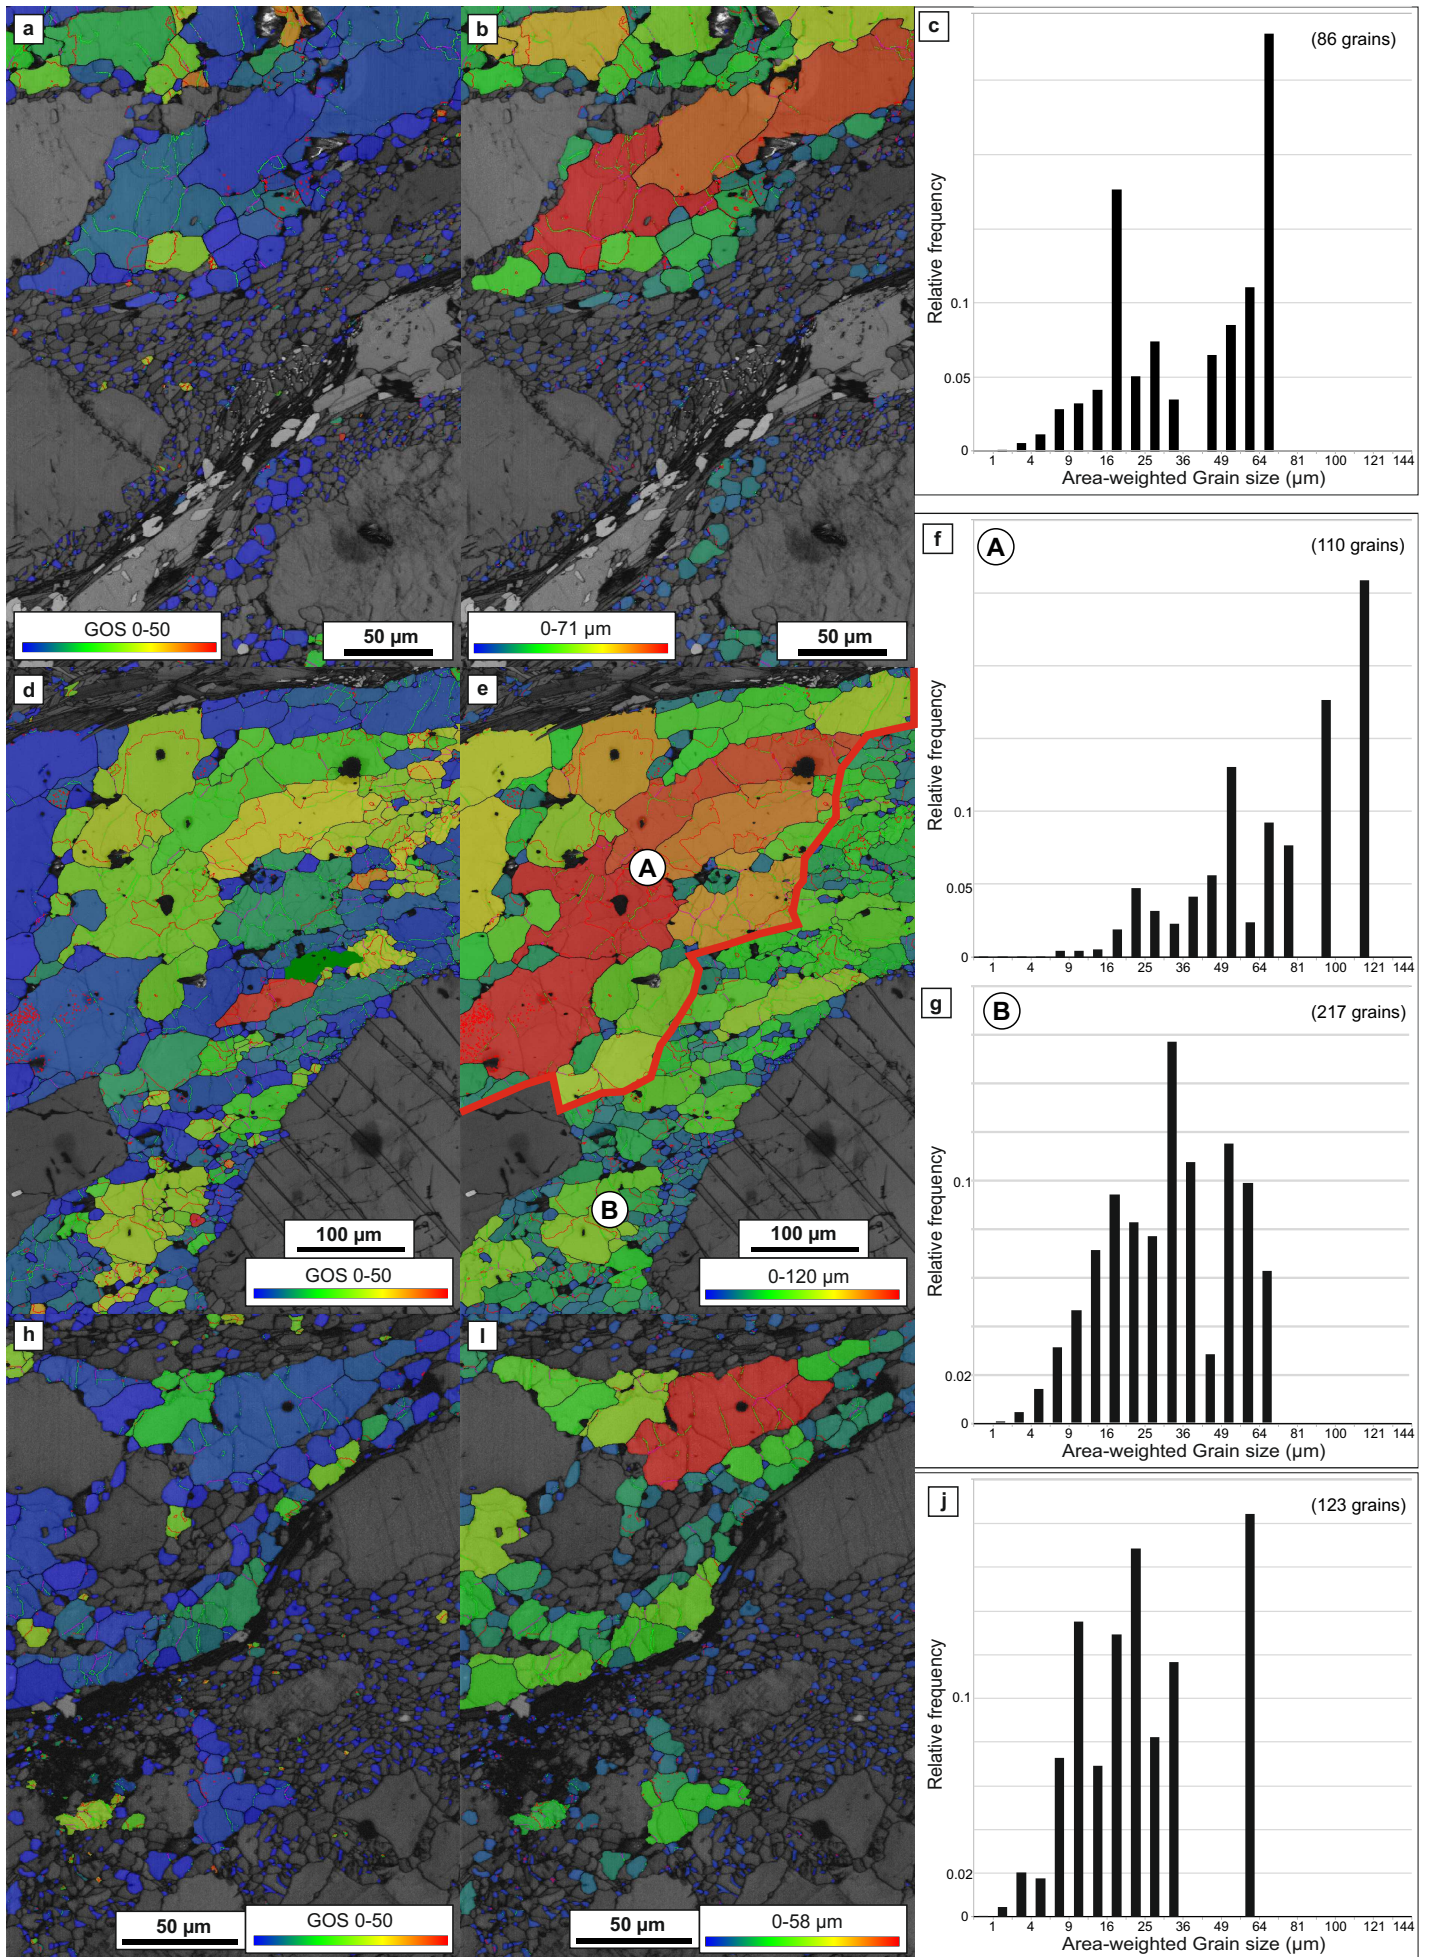

Figure SOM5

**Figure SOM1.** Grain Orientation Spread (GOS) maps for areas reported in Figs. 4 showing the average orientation spread for each grain of plagioclase (a), quartz (b) and K-feldspar (c) in the related frequency histograms. For (a) two misorientation profile across plagioclase subgrains are reported to show the limited internal distortion of plagioclase grains and the abrupt change in orientation across the analysed subgrain boundary.

**Figure SOM2.** EBSD orientation maps for K-feldspar and plagioclase. (a) Orientation map for K-feldspar of Fig. 3. (b) Pole figures reporting the crystallographic orientation of K-feldspar porphyroclasts and tails. (c) Misorientation axis distributions in sample (upper row) and crystal (lower row) coordinate system for porphyroclasts and tails. (d) Pole figures reporting the crystallographic orientation of K-feldspar porphyroclast and fine-grained K-feldspar aggregate in the strain shadow (Area D Fig. 4). (e) Misorientation axis distributions in sample (upper row) and crystal (lower row) coordinate system for fine-grained K-feldspar aggregate. (f) Grain size distribution for the fine-grained K-feldspar aggregate. (g) Orientation map for Plagioclase and (h) K-feldspar. (i) Pole figures reporting the crystallographic orientation of plagioclase porphyroclast. (j) Pole figures reporting the crystallographic orientation of K-feldspar tail.

**Figure SOM3.** Backscattered and Cathodoluminescence images of Rieserferner mylonites. (a) BSE image of pure quartz layers (Qtz) between two sheared K-feldspar-myrmekite (Kfs) aggregate. (b) CL image of (a). Note the homogeneous signature of quartz and the complex microstructure of K-feldspar aggregate. (c) BSE image of a K-feldspar aggregate enveloped by sheared myrmekite. The top-left corner of the K-feldspar grain is reported in the map of Fig. 3. (d) CL image of (c). Note the complex microstructure of K-feldspar aggregate. (e) K-feldspar aggregate and sheared myrmekite. (f) CL image of (e).

**Figure SOM4.** EBSD orientation data and mapping for pure quartz layers. (a) Orientation map colour coded according to the inverse pole figure for Y-direction reported in the lower right corner. (b) Area-weighted grain size distribution for pure quartz layer. (c) Pole figures for quartz [c], <a> and {r} crystallographic elements. (d) Misorientation axis distributions in sample (upper row) and crystal (lower row) coordinate system. (e) Misorientation angle distribution for quartz.

**Figure SOM5.** Grain size and GOS maps for EBSD maps reported in Fig. 4, SOM2, 3, respectively, and relative quartz grain size distributions. (a) (b) (c) Grain size, GOS maps and grain size distribution for map reported in Fig. 5. (d) (e) (f) (g) Grain size, GOS maps and grain size distribution for map reported in Fig. SOM2. (h) (i) (j) Grain size, GOS maps and grain size distribution for map reported in Fig. 3.
