# Supplementary material for: Myrmekite and strain weakening in granitoid mylonites
Source: Copernicus journal article supplement (doi:10.5194/se-2018-70), 2018-08-01
Supplement: Supplementary file [file se-2018-70-AC4-supplement.zip]

### ***Derivation of the deformation mechanism maps and aggregate flow laws.***

The bulk strain rate ( $\dot{\epsilon}_{bulk}$ ) of a mineral aggregate is given by:

$$(1) \quad \dot{\epsilon}_{bulk} = \dot{\epsilon}_{Disl} + \dot{\epsilon}_{Diff}$$

where:  $\dot{\epsilon}_{Disl}$  and  $\dot{\epsilon}_{Diff}$  represents the strain rates of dislocation creep and diffusion creep of mineral components, respectively.

Quartz. The deformation mechanisms map of Fig. 9a has been calculated as follows. The flow law of Hirth et al. (2001) has been used to calculate the contribution of dislocation creep of quartz:

$$(2) \quad \dot{\epsilon}_{q-Disl} = A_q f_h \sigma^n e^{(-\frac{Q_q}{RT})}$$

where:  $A_q$  is the pre-exponential factor for quartz ( $\text{MPa}^{-n} \text{s}^{-1}$ );  $f_h$  is the water fugacity;  $\sigma$  is the differential stress (MPa);  $n$  is the stress exponent;  $Q_q$  is the activation energy (J);  $R$  is the gas constant ( $\text{J/K} \cdot \text{mol}$ );  $T$  is the temperature (K). Following Platt (2015), the flow law of den Brok (1998) for thin-film model of pressure-solution has been used to calculate the contribution of pressure-solution to quartz deformation:

$$(3) \quad \dot{\epsilon}_{q-Diff} = \dot{\epsilon}_{qps} = C_2 \frac{\rho_f}{\rho_s} \frac{\sigma}{d^3} \frac{VcD_w}{RT}$$

where:  $C_2$  is a shape constant;  $\rho_f$  and  $\rho_s$  are the fluid and solid densities ( $\text{Kg m}^{-3}$ ), respectively;  $d$  is the grain size ( $\mu\text{m}$ );  $V$  is the molar volume ( $\mu\text{m}^3 \text{mol}^{-1}$ );  $c$  is the solubility of the solid in the fluid phase (molar fraction);  $D_w$  is the diffusivity of the solid in the grain-boundary fluid film ( $\mu\text{m}^2 \text{s}^{-1}$ ).

Feldspars. The flow laws of Rybacki et al. (2006) have been used to calculate the contribution of dislocation and diffusion creep of feldspar:

$$(4) \quad \dot{\epsilon} = A_f f_h \frac{\sigma^n}{d^m} e^{(-\frac{Q_f + pV^{act}}{RT})}$$

$$(5) \quad \dot{\epsilon}_{f-Disl} = A_f f_h \sigma^3 e^{(-\frac{Q_f + pV^{act}}{RT})}$$

$$(6) \quad \dot{\epsilon}_{f-Diff} = A_f f_h \frac{\sigma}{d^3} e^{(-\frac{Q_f + pV^{act}}{RT})}$$

where:  $A_f$  is the pre-exponential factor for feldspar ( $\text{MPa}^{-n} \mu\text{m}^m \text{s}^{-1}$ );  $d$  is the grain size ( $\mu\text{m}$ );  $m$  is the grain-size exponent ( $m=3$  for diffusion creep;  $m=0$  for dislocation creep);  $p$  is the confining pressure (MPa);  $V^{act}$  is the activation volume ( $\text{m}^3 \text{mol}^{-1}$ ).

Poly-phase aggregates. Deformation mechanism maps and rheological calculations for poly-phase aggregates (feldspar + quartz, i.e. sheared myrmekite and granitoid rock, Fig. 9b-c) were calculated following the self-consistent approach presented in Dimanov and Dresen (2005) and Platt (2015). The flow law for the poly-phase aggregate is the following:

$$(7) \quad \dot{\epsilon}_{bulk} = \dot{\epsilon}_{Disl} + \dot{\epsilon}_{qps} = A_a f_h \sigma^{n_a} e^{(-\frac{Q_a}{RT})} + \frac{\sigma}{2\mu_a}$$

The flow law parameters  $A_a$ ,  $n_a$ ,  $Q_a$  for the “dislocation creep” component (first term of the equation) are calculated as follows:

$$(8) \quad \log_{10} n_a = \phi_l \log_{10} n_1 + \phi_2 \log_{10} n_2$$

$$(9) \quad Q_a = [Q_2(n_a - n_1) - Q_1(n_a - n_2)] / (n_2 - n_1)$$

$$(10) \quad \log_{10} A_a = [\log_{10} A_2(n_a - n_1) - \log_{10} A_1(n_a - n_2)] / (n_2 - n_1)$$

where:  $n_a$  is the stress exponent for the two-phase mixture;  $\phi_i$  is the volume fraction of the phase  $i$ ;  $n_i$  is the stress exponent of the  $i$  phase;  $Q_a$  is the dislocation creep activation energy for the aggregate (J);  $Q_i$  is the activation energy for the  $i$  phase (J);  $A_a$  is the pre-exponential factor for the aggregate ( $\text{MPa}^{-n} \mu\text{m}^m \text{s}^{-1}$ );  $A_i$  is the pre-exponential factor for the  $i$  phase ( $\text{MPa}^{-n} \mu\text{m}^m \text{s}^{-1}$ ). In order to account for water fugacity and activation volumes parameters in feldspar flow laws (Rybacki and Dresen, 2006), we implemented the model of Platt (2015), which includes the activation volume for feldspars in the calculation of the aggregate activation energy  $Q_a$ , as follows:

$$(11) \quad Q_a = [(Q_f + pV^{act})(n_a - n_Q) - Q_Q(n_a - n_f)] / (n_f - n_Q)$$

where:  $p$  is the confining pressure (MPa);  $V^{act}$  is the activation volume for feldspars ( $\text{m}^3/\text{mol}$ ). Water fugacity coefficients were integrated in the resulting flow law of poly-phase aggregates deforming by dislocation creep:

$$(12) \quad \dot{\epsilon}_{Disl} = A_a f_h \sigma^{n_a} e^{(-\frac{Q_a}{RT})}$$

Following the approach of Dimanov and Dresen (2005) and Platt (2015), the second term of the equation representing the contribution of “diffusion creep” has been calculated by considering

pressure-solution (in quartz) and diffusion creep (in feldspar) to contribute linearly to the bulk viscosity of the aggregate,  $\mu_a$ :

$$(13) \quad 3\mu_a^2 + [2(\mu_q + \mu_f) - 5(\phi_q\mu_q + \phi_f\mu_f)]\mu_a - 2\mu_q\mu_f = 0$$

where

$$(14) \quad \mu_q = \frac{\sigma}{2\varepsilon_{qps}}$$

is the viscosity of quartz deforming via pressure-solution processes calculated following the thin-film model of den Brok (1998); and

$$(15) \quad \mu_f = \frac{\sigma}{2\varepsilon_{f-diff}}$$

is the viscosity of feldspar deforming via diffusion creep.

The rheological modelling of poly-phase aggregates containing more than two rheological phases (e.g. a granitoid composed of plagioclase + quartz + myrmekite, Fig. 9d) has been performed iteratively applying the calculation of Platt (2015). For example, for a mixture composed of  $\phi_X$ ,  $\phi_Y$  and  $\phi_Z$  volume fractions of the phases X (plagioclase), Y (quartz), and Z (sheared myrmekite):

- (i) Firstly,  $n_{XY}$ ,  $Q_{XY}$ ,  $A_{XY}$  flow law parameters for the XY two-phase mixture are calculated following equations (8), (9) and (10), adopting the volume fractions  $\phi_{XI}$  and  $\phi_{YI}$  defined as follows:

$$(16) \quad \phi_{XI} = \phi_X / (1 - \phi_Z); \phi_{YI} = \phi_Y / (1 - \phi_Z).$$

- (ii) Then for the calculation of the three-phase mixture flow law parameters  $n_{XYZ}$ ,  $Q_{XYZ}$ ,  $A_{XYZ}$ , considering the three-phase mixture as the result of mixing between phases “XY” and Z, volume fractions are recalculated as follow:

$$(17) \quad \phi_{XY} = \phi_X + \phi_Y; \phi_Z = \phi_Z.$$

and the parameters are calculated as follow:

$$(18) \quad n_{XYZ} = 10^{(\phi_{XY} \log_{10} n_{XY} + \phi_Z \log_{10} n_Z)}$$

$$(19) \quad Q_{XYZ} = [Q_Z(n_{XYZ} - n_{XY}) - Q_{XY}(n_{XYZ} - n_Z)] / (n_Z - n_{XY})$$

$$(20) \quad A_{XYZ} = 10^{[\log_{10} A_Z(n_{XYZ} - n_{XY}) - \log_{10} A_{XY}(n_{XYZ} - n_Z)] / (n_Z - n_{XY})}.$$

For the calculation of the rheology of an aggregate in which dislocation and diffusion creep contribute in different proportions to the total strain rate (granitoid rock including a variable amount of myrmekite, see Discussion below), a limiting factor  $\theta$  has been introduced in equation (7). For example, for an aggregate in which diffusion creep is limited to a specific volume proportion of phases:

$$(21) \quad \dot{\epsilon}_{bulk} = A_a f_h \sigma^{n_a} e^{(-\frac{Q_a}{RT})} + \theta_{diff} \frac{\sigma}{2\mu_a}$$

where  $\theta_{diff}$  represents the volume fraction of the phases undergoing diffusion creep in the aggregate. To consider the progressive transformation of feldspar into myrmekite with increasing strain, differential stress vs. strain rate curves have been calculated for a “granitoid” aggregate with increasing vol% of myrmekite substituting for feldspar (Fig. 9c). The progression of the reaction is quantified by the reaction progress factor  $\chi$ . The maximum volume percentage of feldspar substitution has been limited to

$$(22) \quad \phi_{MAX} = 20 \text{ vol\%} ;$$

the average concentration of K-feldspar in granite and granodiorite. For  $\chi=0$  (no myrmekite), the rock is composed of 60 vol% plagioclase  $An_{100}$  and 40 vol% quartz. For  $\chi>0$ , plagioclase  $An_{100}$  (representing K-feldspar) is increasingly replaced by myrmekite. Myrmekite  $\phi_{Myrm}$ , plagioclase  $\phi_{Plg}$  and quartz  $\phi_{Qtz}$  volume proportions in the rock are then re-calculated as follows, respectively:

$$(23) \quad \phi_{Myrm}^1 = \chi * \phi_{MAX};$$

$$(24) \quad \phi_{Plg}^1 = \phi_{Plg} - \chi * \phi_{MAX};$$

$$(25) \quad \phi_{Qtz}^1 = \phi_{Qtz}$$

The calculation of the rheology of a granitoid rock with variable amount of sheared myrmekite takes into account the case in which grain size sensitive creep occurs only in sheared myrmekite, whereas granitoid quartz and feldspars deform only by dislocation creep. Therefore, the contribution of diffusion creep to bulk viscosity in equation (21) is proportional to

$$(26) \quad \theta_{diff} = \chi * \phi_{MAX}$$

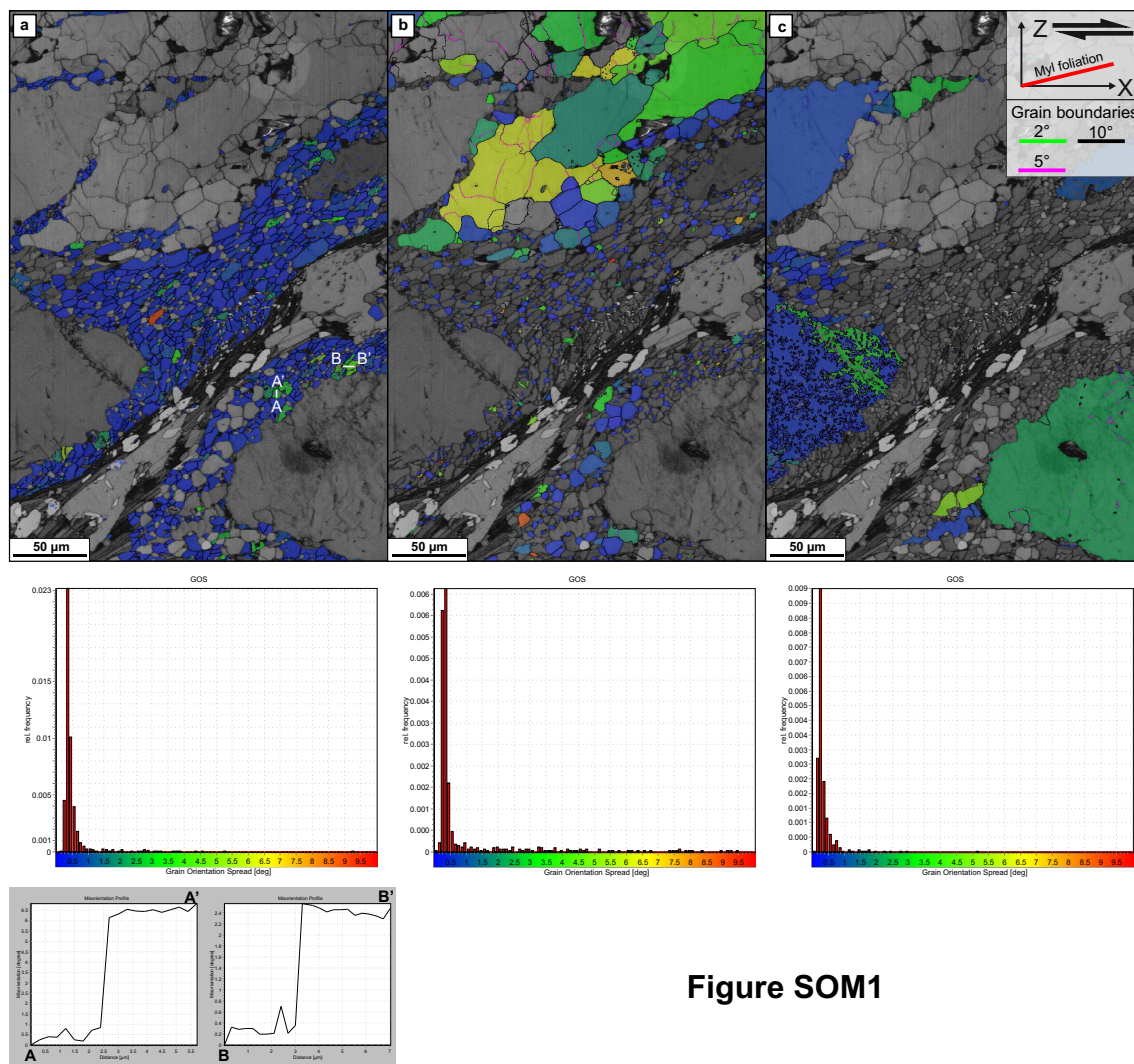

Figure SOM1

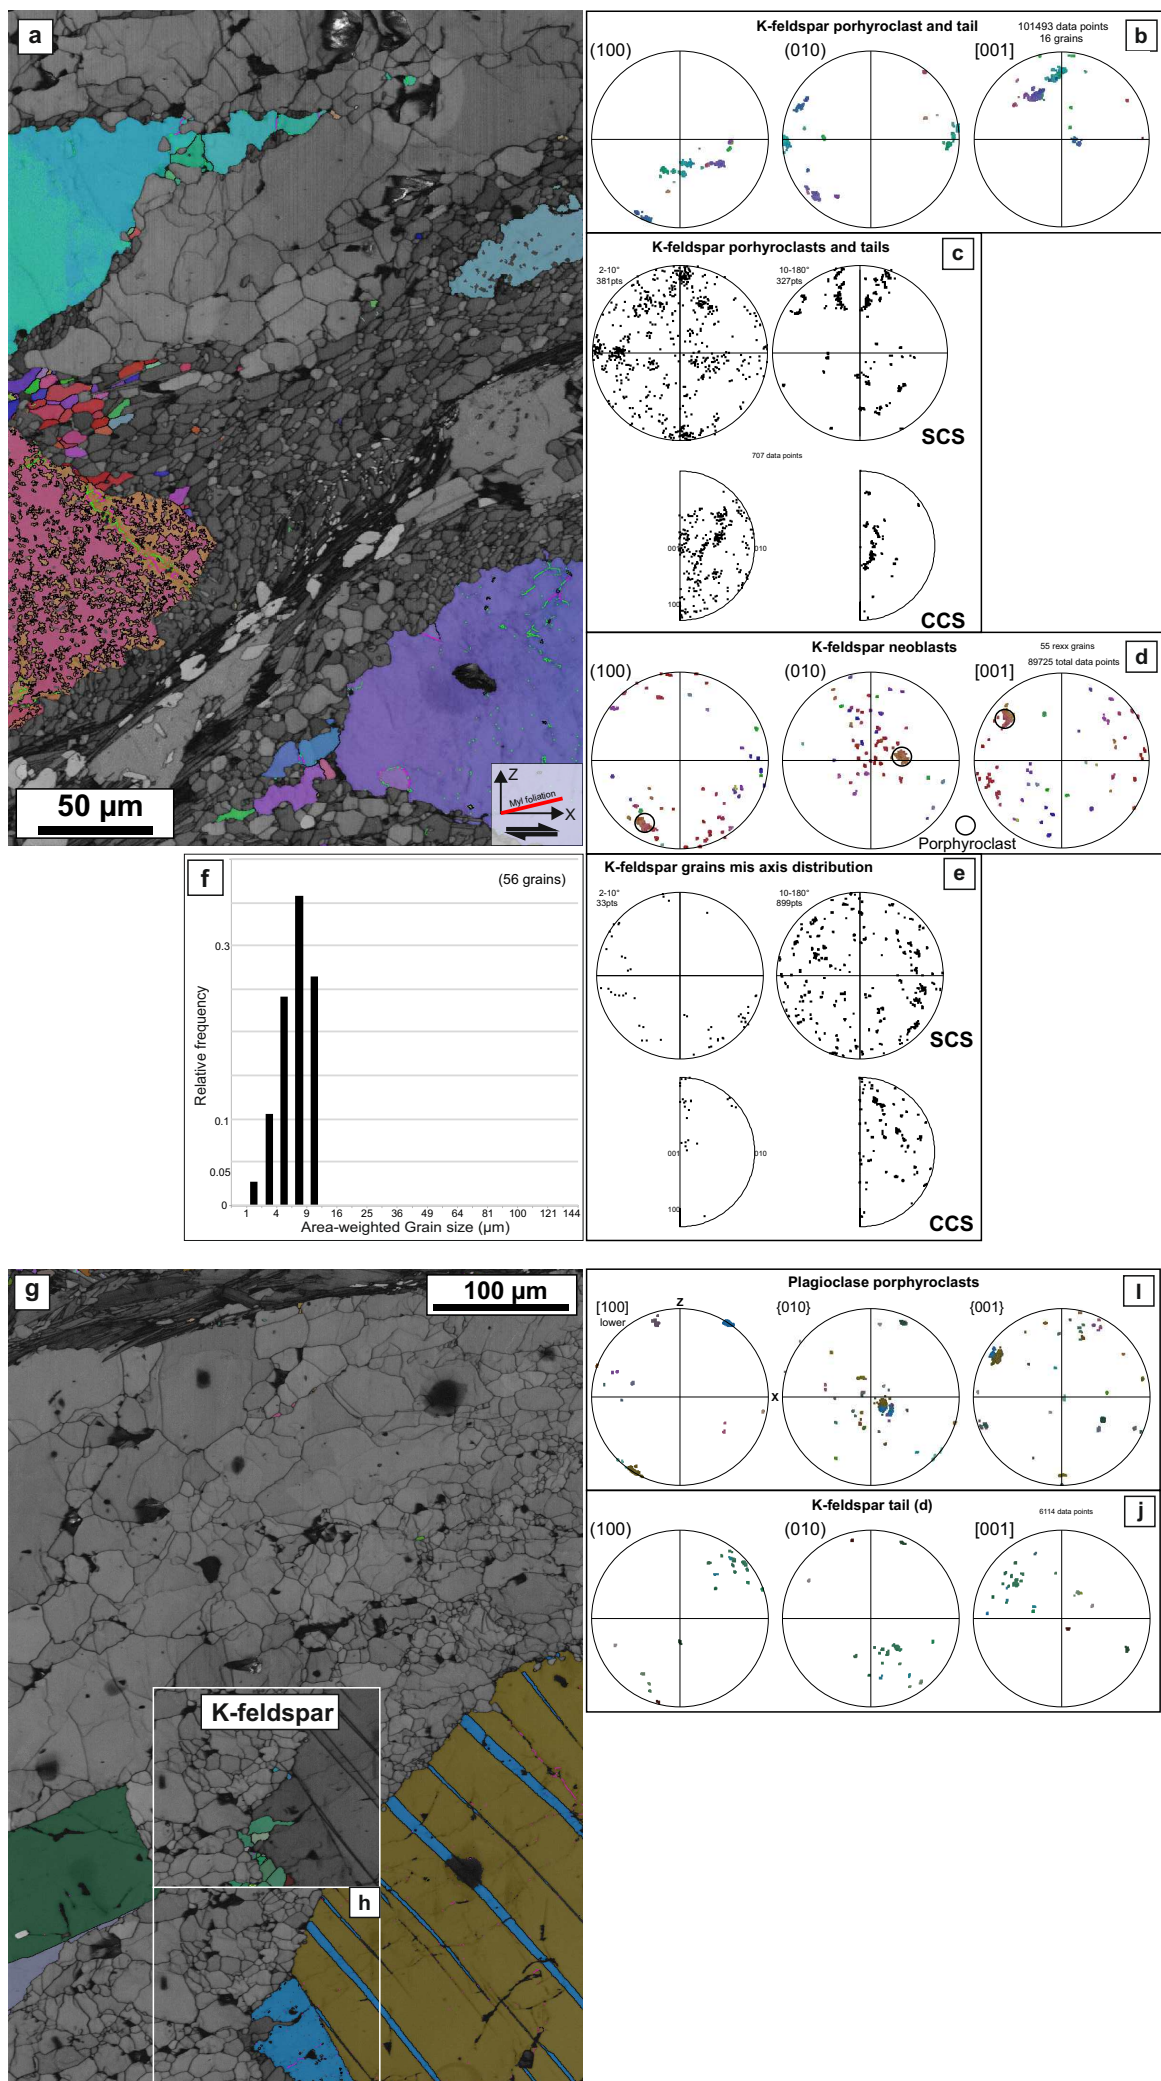

Fig. SOM2



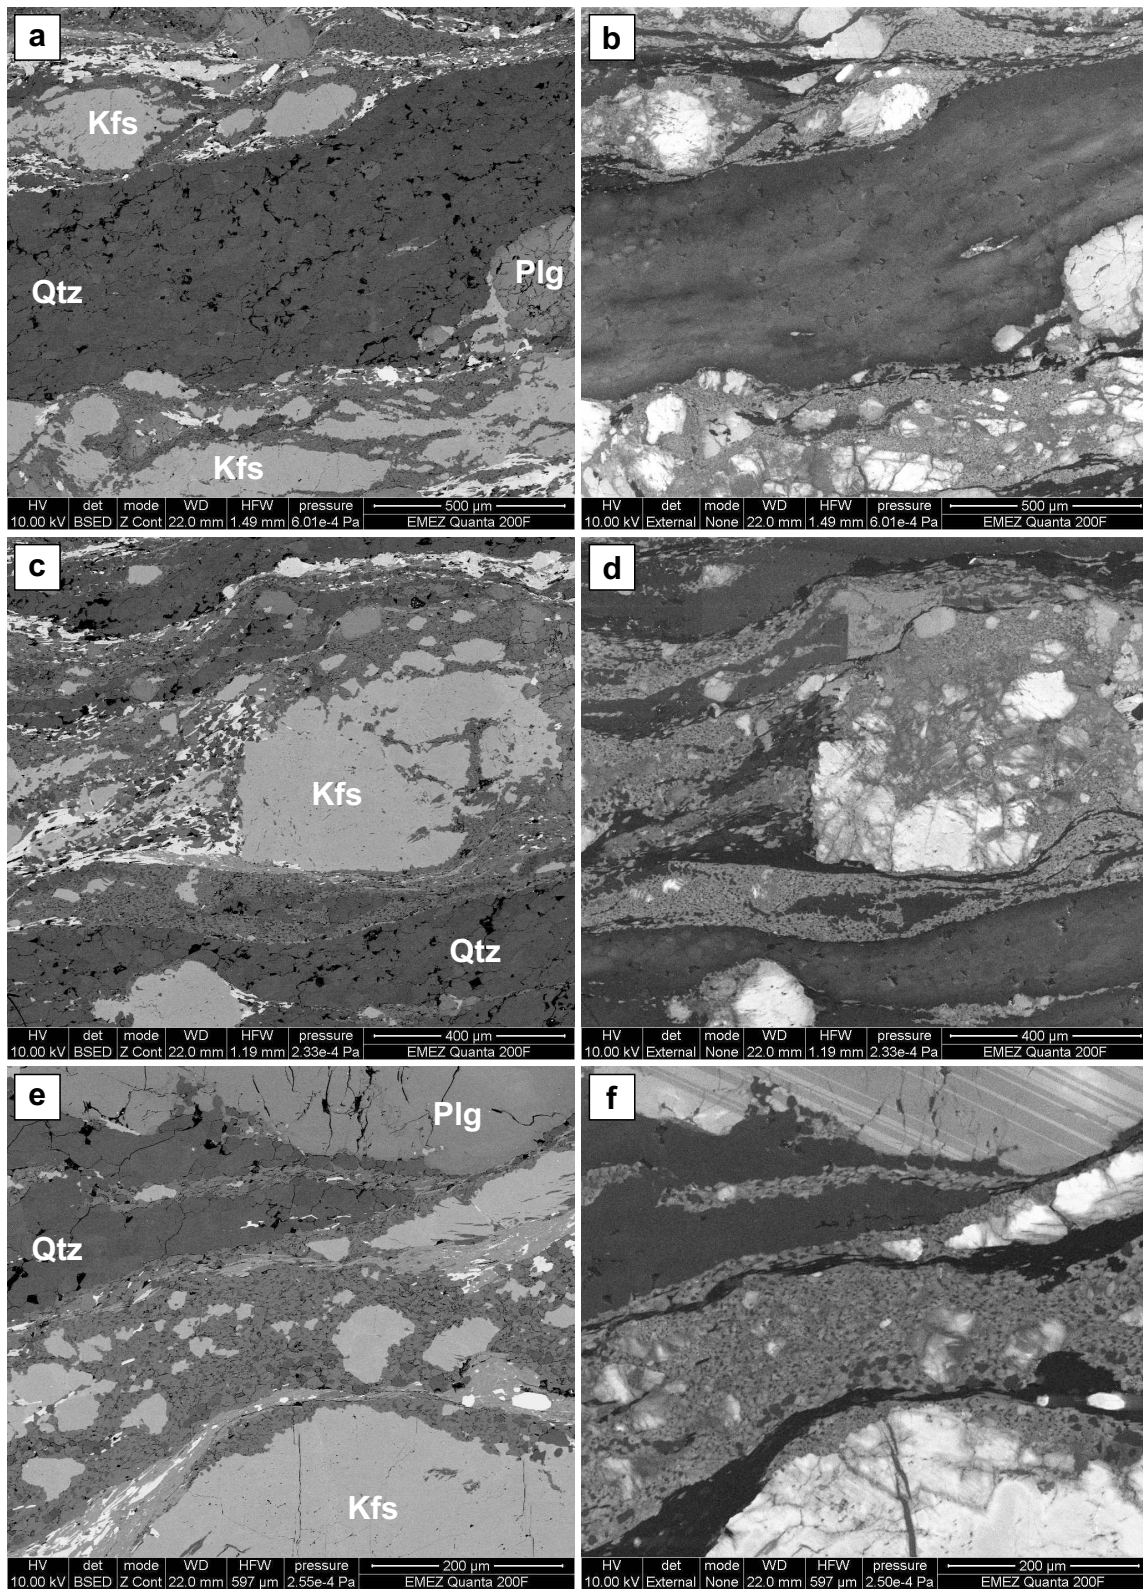

**Figure SOM3**

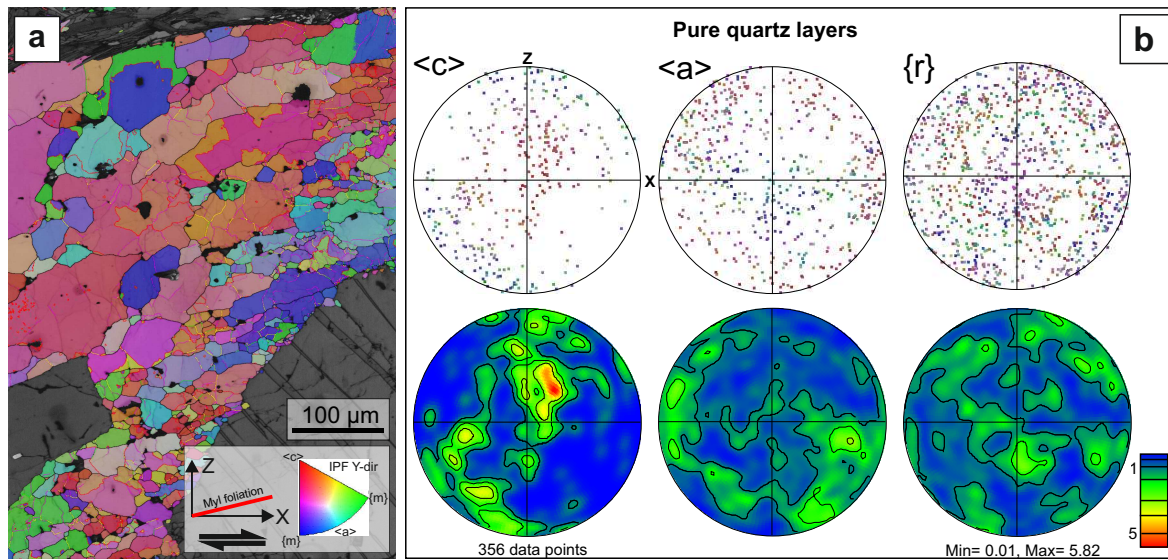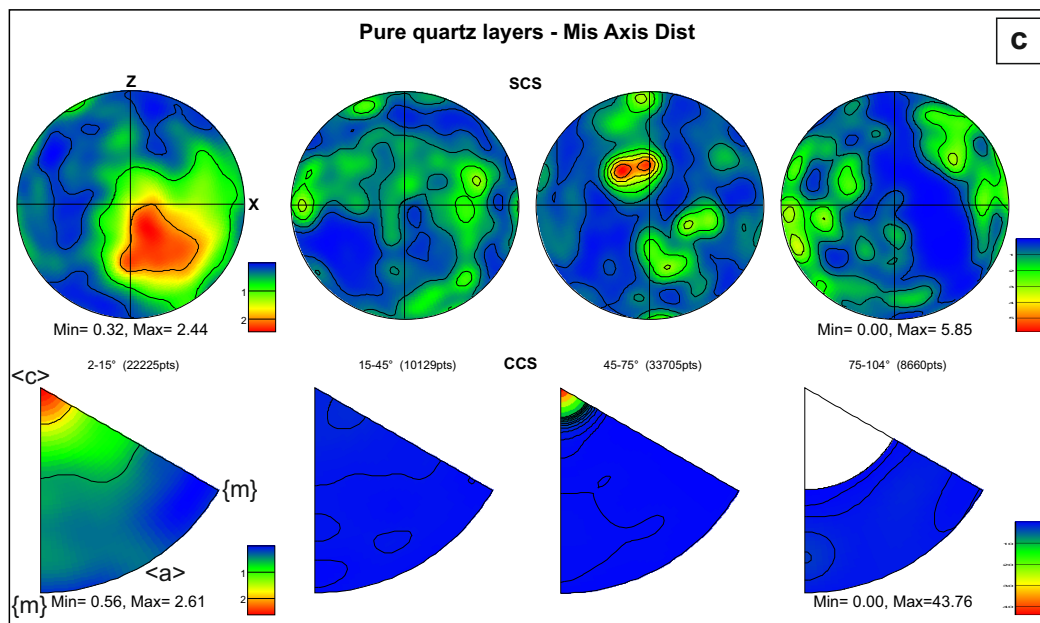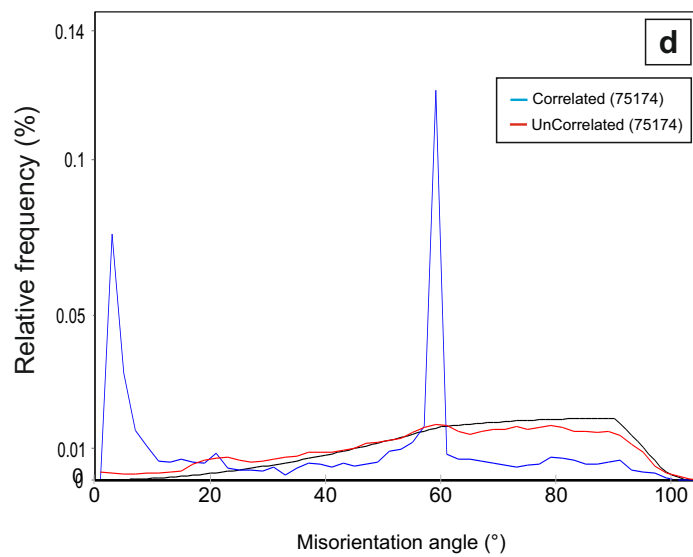

**Figure SOM4**



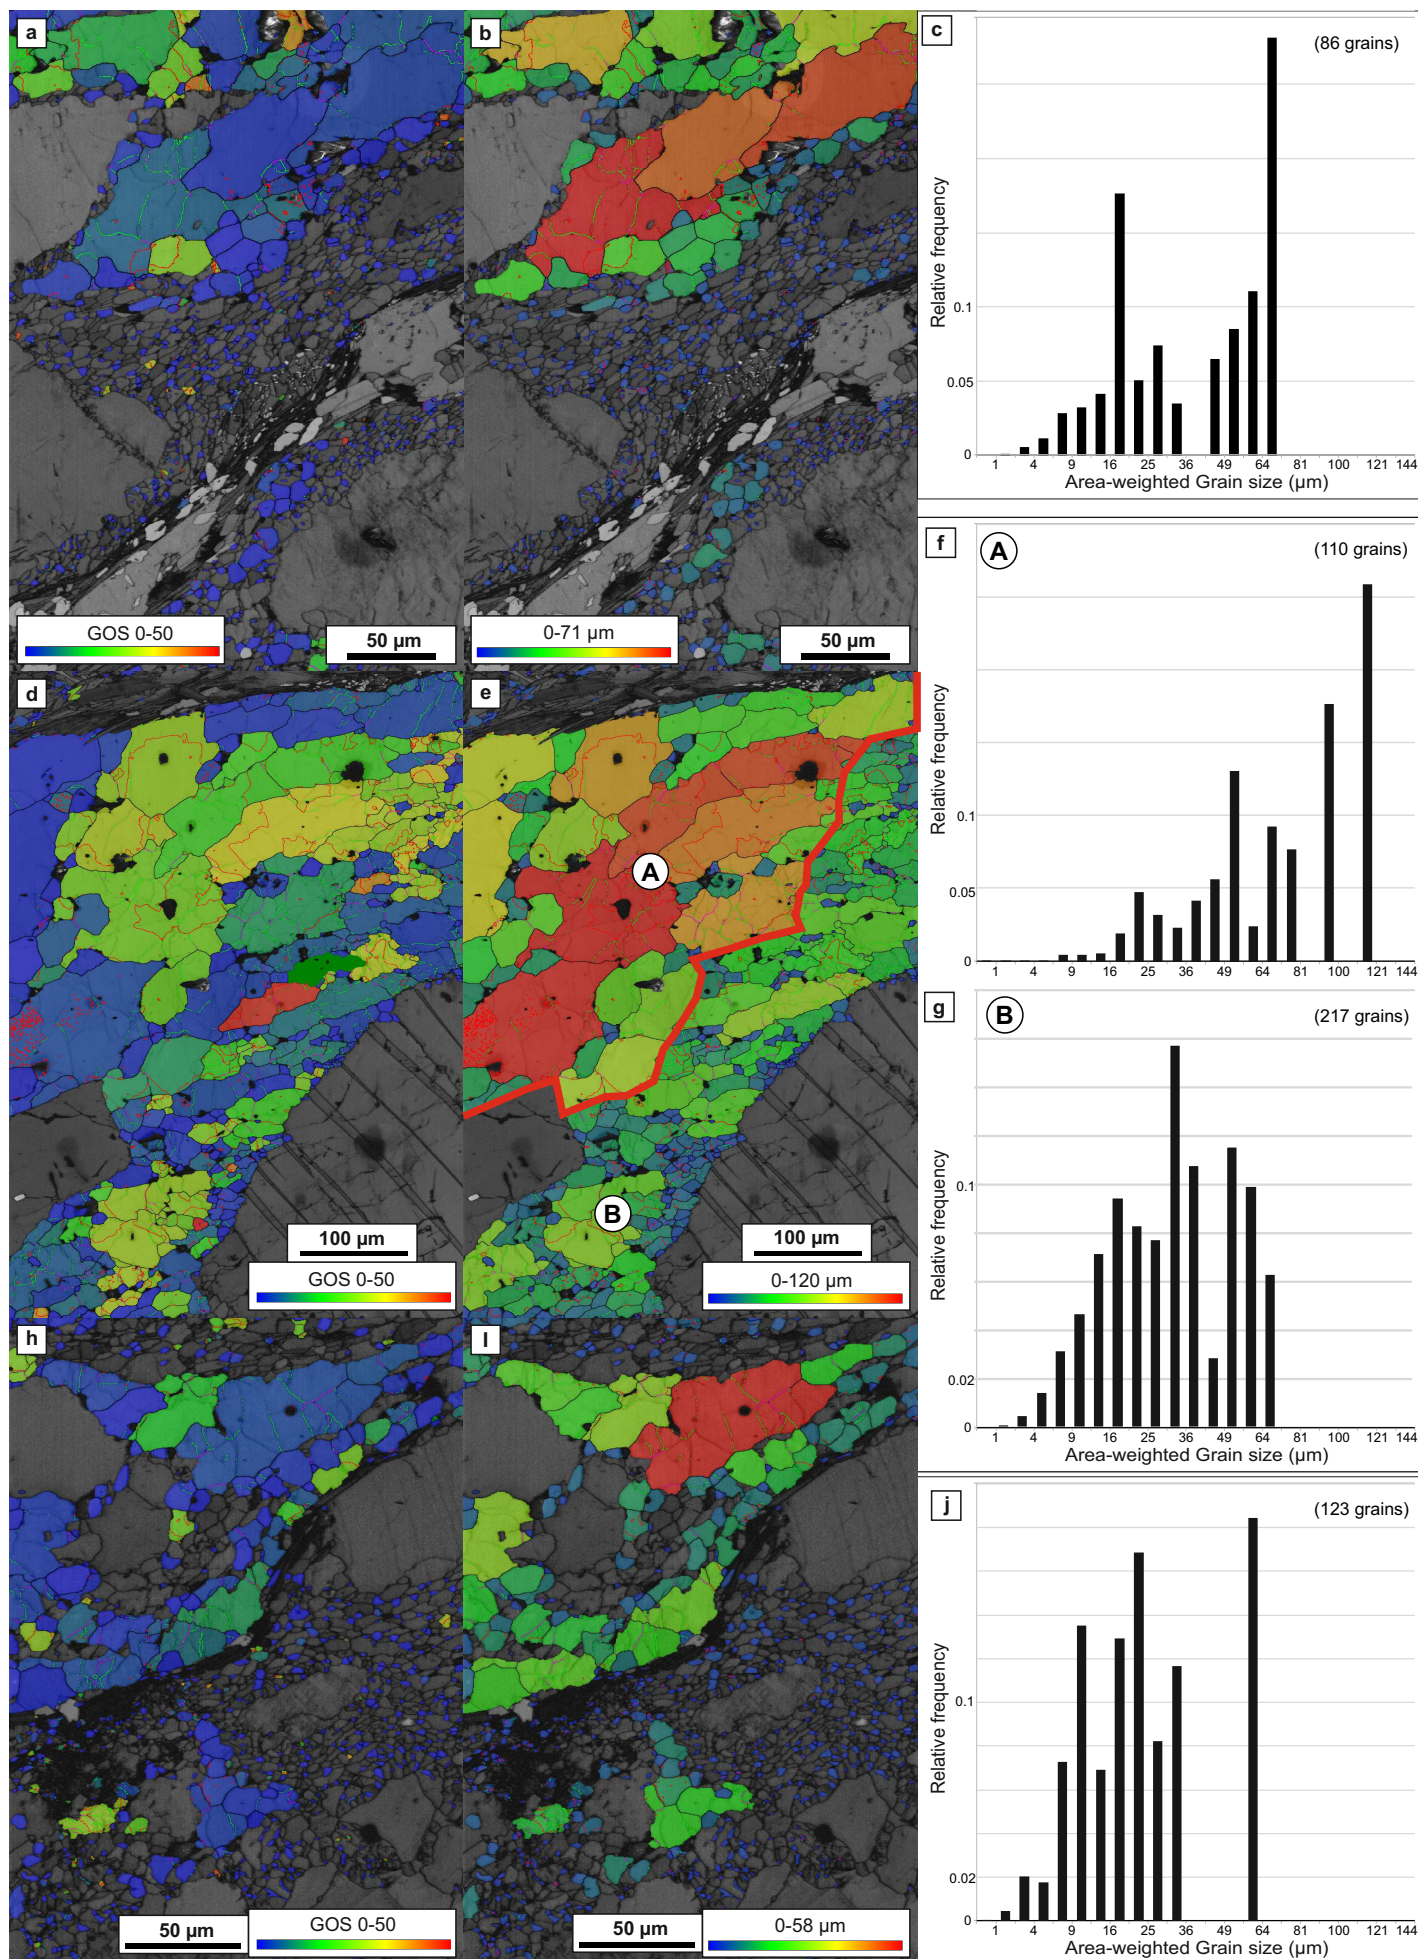

Figure SOM5

**Figure SOM1.** Grain Orientation Spread (GOS) maps for areas reported in Figs. 4 showing the average orientation spread for each grain of plagioclase (a), quartz (b) and K-feldspar (c) in the related frequency histograms. For (a) two misorientation profile across plagioclase subgrains are reported to show the limited internal distortion of plagioclase grains and the abrupt change in orientation across the analysed subgrain boundary.

**Figure SOM2.** EBSD orientation maps for K-feldspar and plagioclase. (a) Orientation map for K-feldspar of Fig. 3. (b) Pole figures reporting the crystallographic orientation of K-feldspar porphyroclasts and tails. (c) Misorientation axis distributions in sample (upper row) and crystal (lower row) coordinate system for porphyroclasts and tails. (d) Pole figures reporting the crystallographic orientation of K-feldspar porphyroclast and fine-grained K-feldspar aggregate in the strain shadow (Area D Fig. 4). (e) Misorientation axis distributions in sample (upper row) and crystal (lower row) coordinate system for fine-grained K-feldspar aggregate. (f) Grain size distribution for the fine-grained K-feldspar aggregate. (g) Orientation map for Plagioclase and (h) K-feldspar. (i) Pole figures reporting the crystallographic orientation of plagioclase porphyroclast. (j) Pole figures reporting the crystallographic orientation of K-feldspar tail.

**Figure SOM3.** Backscattered and Cathodoluminescence images of Rieserferner mylonites. (a) BSE image of pure quartz layers (Qtz) between two sheared K-feldspar-myrmekite (Kfs) aggregate. (b) CL image of (a). Note the homogeneous signature of quartz and the complex microstructure of K-feldspar aggregate. (c) BSE image of a K-feldspar aggregate enveloped by sheared myrmekite. The top-left corner of the K-feldspar grain is reported in the map of Fig. 3. (d) CL image of (c). Note the complex microstructure of K-feldspar aggregate. (e) K-feldspar aggregate and sheared myrmekite. (f) CL image of (e).

**Figure SOM4.** EBSD orientation data and mapping for pure quartz layers. **(a)** Orientation map colour coded according to the inverse pole figure for Y-direction reported in the lower right corner. **(b)** Area-weighted grain size distribution for pure quartz layer. **(b)** Pole figures for quartz [c], <a> and {r} crystallographic elements. **(c)** Misorientation axis distributions in sample (upper row) and crystal (lower row) coordinate system. **(d)** Misorientation angle distribution for quartz.

**Figure SOM5.** Grain size and GOS maps for EBSD maps reported in Fig. 4, SOM2, 3, respectively, and relative quartz grain size distributions. (a) (b) (c) Grain size, GOS maps and grain size distribution for map reported in Fig. 5. (d) (e) (f) (g) Grain size, GOS maps and grain size distribution for map reported in Fig. SOM2. (h) (i) (j) Grain size, GOS maps and grain size distribution for map reported in Fig. 3.
